# Supplementary material
Source: Royal Society of Chemistry journal article supplement (doi:10.1039/d6em00108d)
Supplement: d6em00108d1.pdf [file d6em00108d1.pdf]

### Supplementary Materials:

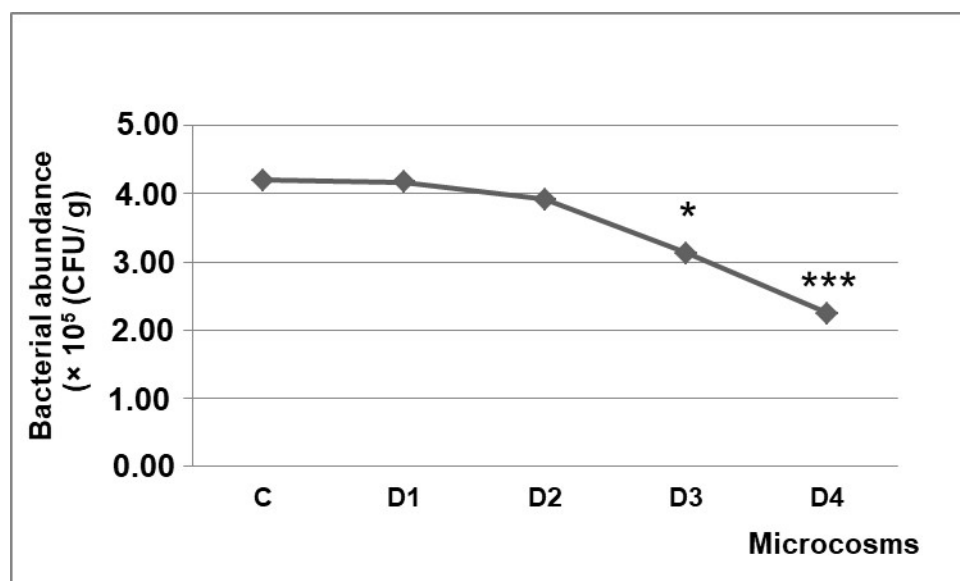

**Figure S1:** Bacterial density in controls (c) and those treated with different concentrations of Irgasan. Differences from the control (\* =  $p < 0.05$ ; \*\* =  $0.05 \leq p < 0.001$ ; \*\*\* =  $0.001 \leq p < 0.0001$ ).

**Table S1:** Nominal and measured concentrations of Irgasan in the enriched sediment and control groups (standard deviations are reported).

| <b>Irgasan (ug/g)</b> |         |                    |
|-----------------------|---------|--------------------|
|                       | Nominal | Measured average   |
| C                     | nd      | nd                 |
| D1                    | 0.08    | $0.054 \pm 0.006$  |
| D2                    | 0.8     | $0.225 \pm 0.007$  |
| D3                    | 8       | $2.054 \pm 0.029$  |
| D4                    | 80      | $13.854 \pm 2.012$ |
